# Supplementary material
Source: Elsevier journal article supplement (https://www.sciencedirect.com/science/article/pii/S1888989120301282)
Supplement: mmc2 [file S1888989120301282:mmc2.docx]

**Supplementary Table 2. Current prevalence of probable mental disorders by participating Autonomous Community (N = 9,138).**

|  | | | **Response**  **ratea** | **Participation rateb** | **Completion ratec** | **Current MDD (n = 2,554)** | **Current GAD**  **(n = 2007)** | **Current Panic Attacks (n = 2064)** | **Current PTSD**  **(n = 1946)** | **Current Substance Use Disorder (n = 569)** | **Any current Mental Disorder (n = 4,118)** | **Any current severe Mental Disorder (n=1278)** | **Positive COVID-19 (n=1,354)** | ***Prevalence of Positive COVID-19 Spanish Health Professionalsd*** |
| --- | --- | --- | --- | --- | --- | --- | --- | --- | --- | --- | --- | --- | --- | --- |
|  | **n** | **%** | **%** | **%** | **%** | **% (SE)** | **% (SE)** | **% (SE)** | **% (SE)** | **% (SE)** | **% (SE)** | **% (SE)** | **% (SE)** | ***% (95%CI)*** |
| Total |  |  | 12.50 | 89.60 | 80.60 | 28.1 (0.5)* | 22.5 (0.4)* | 24.0 (0.5)* | 22.2 (0.4)* | 6.2 (0.3)* | 45.7 (0.5)* | 14.5 (0.5)* | 12.50 | *10.0 (7.9 -12.5)* |
| Andalusia | 85 | 3.8 | 2.20 | 85.32 | 83.87 | 13.8 (1.9)* | 11.6 (1.7)* | 16.2 (2.1)* | 13.4 (1.8)* | 4.9 (1.2) | 27.3 (2.5)* | 9.4 (2.1)* | 0.0 (0.0)* | *8.0 (4.5 – 14.9)* |
| Basque Country | 1,678 | 17.6 | 9.20 | 89.22 | 77.5 | 22.4 (1.0) | 17.7 (1.0) | 20.0 (1.0) | 20.0 (1.0) | 6.4 (0.6) | 41.5 (1.2) | 12.7 (1.0) | 12.7 (0.8) | *9.1 (3.6 – 21.3)* |
| Catalonia | 3,399 | 38.9 | 8.31 | 89.52 | 82.14 | 26.2 (0.7) | 21.8 (0.7) | 25.1 (0.8) | 19.5 (0.7) | 6.0 (0.4) | 44.4 (0.9) | 14.1 (0.8) | 12.3 (0.6) | *11.4 (6.8 – 18.5)* |
| Castile Leon | 238 | 2.0 | 16.70 | 86.07 | 77.62 | 21.1 (3.1) | 17.5 (2.9) | 17.6 (2.9) | 18.3 (2.9) | 3.7 (1.4) | 35.2 (3.6) | 8.7 (2.4) | 9.1 (2.2) | *17.2 (10.7 – 26.5)* |
| Community of Madrid | 3,641 | 33.6 | 12.07 | 90.2 | 80.8 | 35.1 (0.9) | 27.7 (0.8) | 26.7 (0.8) | 27.3 (0.8) | 6.1 (0.4) | 52.2 (0.9) | 17.0 (0.8) | 22.2 (0.8) | *22.2 (13.5 – 34.2)* |
| Valencian Community | 97 | 4.2 | 2.30 | 92.86 | 79.81 | 29.1 (2.3) | 20.1 (2.1) | 18.3 (2.0) | 25.9 (2.3) | 9.4 (1.5) | 45.7 (2.6) | 12.8 (3.1) | 6.7 (1.3) | *4.1 (1.2 – 12.7)* |
| p-value |  |  |  | 0.1209 | 0.0017* | <0.001* | <0.001* | <0.001* | <0.001* | 0.07 | <0.001* | <0.001* | <0.001* |  |

* Statistically significant (=0.05).

a Response rate is calculated as the number of participants that completed survey section A (sociodemographic) and B (COVID-19 infection status) divided by the estimated total number of eligible hospital workers by autonomous community. The total number of eligible hospital workers in each autonomous community was estimated using the size of the hospitals' email distribution lists, or by the total number of hospital workers employed as provided by the healthcare centers. The total response rate is adjusted by achieved sample size; the unadjusted total response rate is 9.24%.

b The participation rate is calculated as the number of hospital workers in each autonomous community that agreed to participate in the survey divided by the total number of hospital workers in each autonomous community that responded to the informed consent (i.e., the first page of the web-based survey).

c The completion rate is calculated as the number of participants that completed the survey divided by the participants that agreed to participate in the survey.

d Incidence among health professional. Source: ENECOVID19 study: <https://portalcne.isciii.es/enecovid19/>
